# Supplementary material for: Characterization of Genetically Modified T-Cell Receptors that Recognize the CEA:691-699 Peptide in the Context of HLA-A2.1 on Human Colorectal Cancer Cells
Source: Oxford University Press journal article supplement (doi:10.1158/1078-0432.ccr-08-1638), 2008-12-31
Supplement: 10780432ccr081638-sup-supplementary_data.pdf [file 10780432ccr081638-sup-supplementary_data.pdf]

CDR3 region variations of TRAV8  $\alpha$  and TRBV26  $\beta$  chains:

|                                      |     |     |     |            |            |            |            |     |     |     |     |     |
|--------------------------------------|-----|-----|-----|------------|------------|------------|------------|-----|-----|-----|-----|-----|
| TRBV26*01 CDR3 (Clones 1,2,4; 117T): | C   | A   | S   | S          | L          | G          | <b>T</b>   | G   | D   | Y   | E   | Q   |
|                                      | TGT | GCC | AGC | AGT        | <b>CTC</b> | <b>GGG</b> | <b>ACA</b> | GGG | GAC | TAT | GAA | CAG |
| TRBV26*01 CDR3 (Clone 3; 117L):      | C   | A   | S   | S          | L          | G          | <b>L</b>   | G   | D   | Y   | E   | Q   |
|                                      | TGT | GCC | AGC | AGT        | <b>CTG</b> | <b>GGA</b> | <b>CTG</b> | GGG | GAC | TAT | GAA | CAG |
| TRAV8-1*01 CDR3 (Clone 1; GAT):      | C   | A   | T   | D          | L          | T          | S          | G   | G   | N   | Y   | K   |
|                                      | TGT | GCT | ACT | <b>GAT</b> | <b>CTA</b> | ACC        | TCA        | GGA | GGA | AAC | TAC | AAA |
| TRAV8-1*01 CDR3 (Clones 2,3,4; GAC): | C   | A   | T   | D          | L          | T          | S          | G   | G   | N   | Y   | K   |
|                                      | TGT | GCT | ACT | <b>GAC</b> | <b>CTC</b> | ACC        | TCA        | GGA | GGA | AAC | TAC | AAA |

Supplemental Figure 1: Genetic variation in TCR  $\alpha$  and  $\beta$  chain CDR3 regions from CEA:691-699 reactive murine T cell populations. HLA-A2.1 transgenic mice were immunized with CEA:691-699. Splenocytes were subsequently stimulated with peptide in vitro, and reactive cultures were restimulated with peptide under limiting dilution conditions. From four tumor reactive murine T cell populations that were identified, TCR  $\alpha$  and  $\beta$  chains were identified using a 5' RACE technique followed by DNA sequencing. Two  $\alpha$  chains (TRAV7-D-3\*01 TRAJ15\*01 and TRAV8-1\*01 TRAJ6\*01) and two  $\beta$  chains (TRBV26\*01 TRBD1\*01 TRBJ2-7\*01 TRBC2 and TRBV3\*01 TRBD1\*01 TRBJ1-5\*01 TRBC1) were identified. Additional sequencing revealed the presence of 3  $\alpha$  chains and 3  $\beta$  chains since two genetic variations were identified within the CDR3 regions of both the TRBV26  $\beta$  chain and the TRAV8-1  $\alpha$  chain as shown.

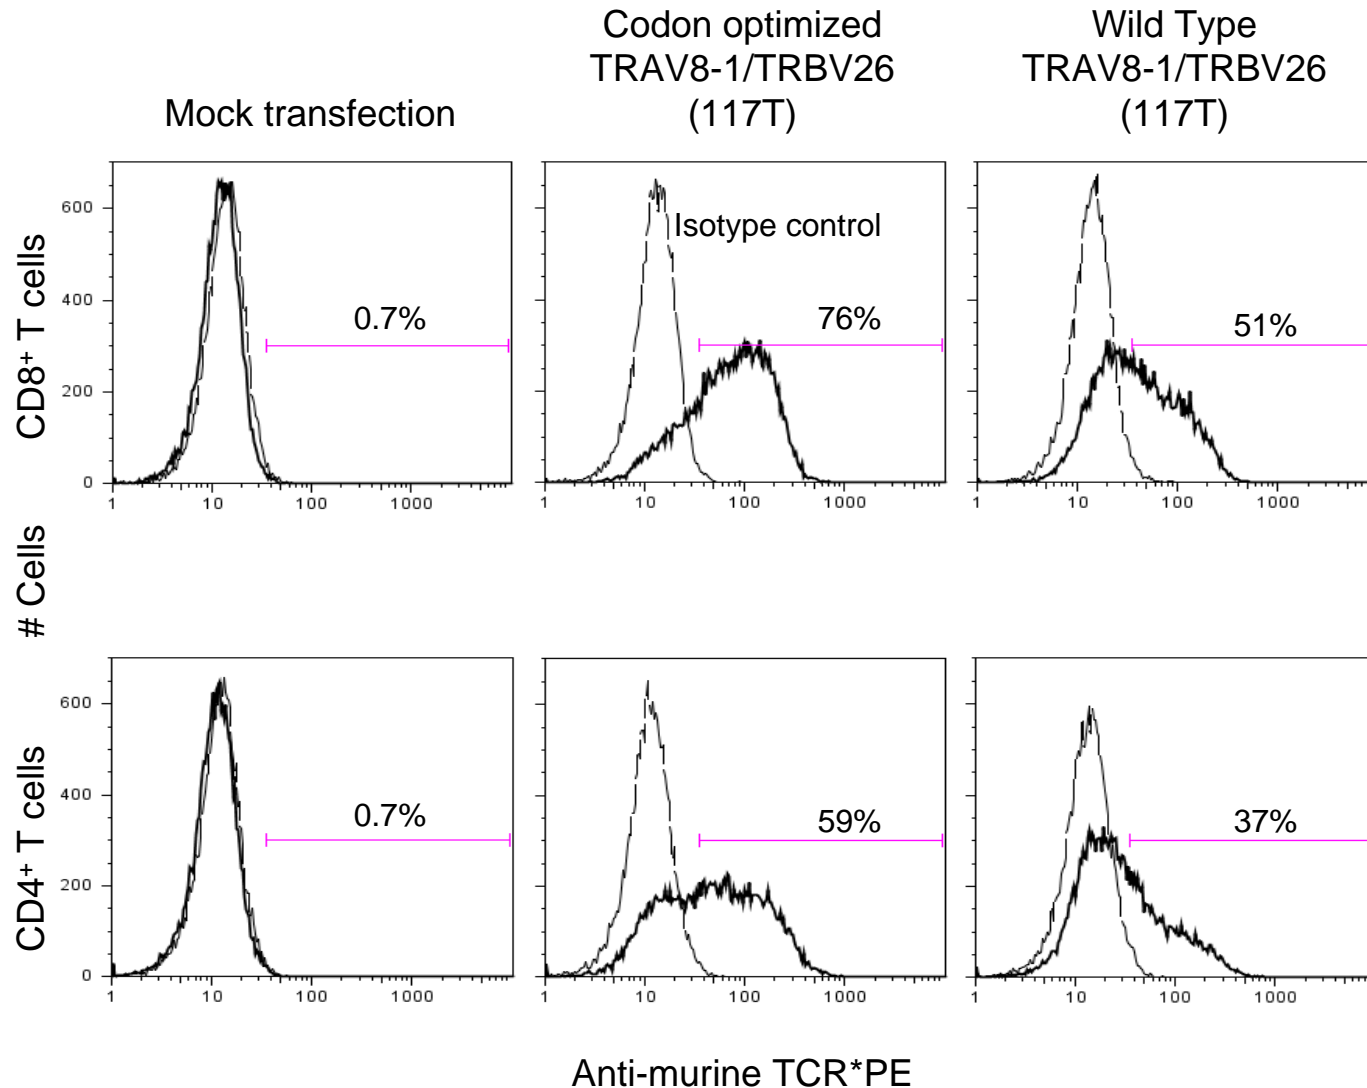

Supplemental Figure 2: Expression of murine TCR by T cells electroporated with CEA:691-699 reactive murine TCR  $\alpha$  and  $\beta$  chain RNAs. RNAs encoding wild type and codon optimized TCR  $\alpha$  and  $\beta$  chains were used to electroporate human CD8+ and CD4+ T cells previously stimulated to proliferate with anti-CD3 and IL-2. TCR expression was evaluated approximately 24 hours later by FACS using a monoclonal antibody against the constant region of the murine  $\beta$  chain.

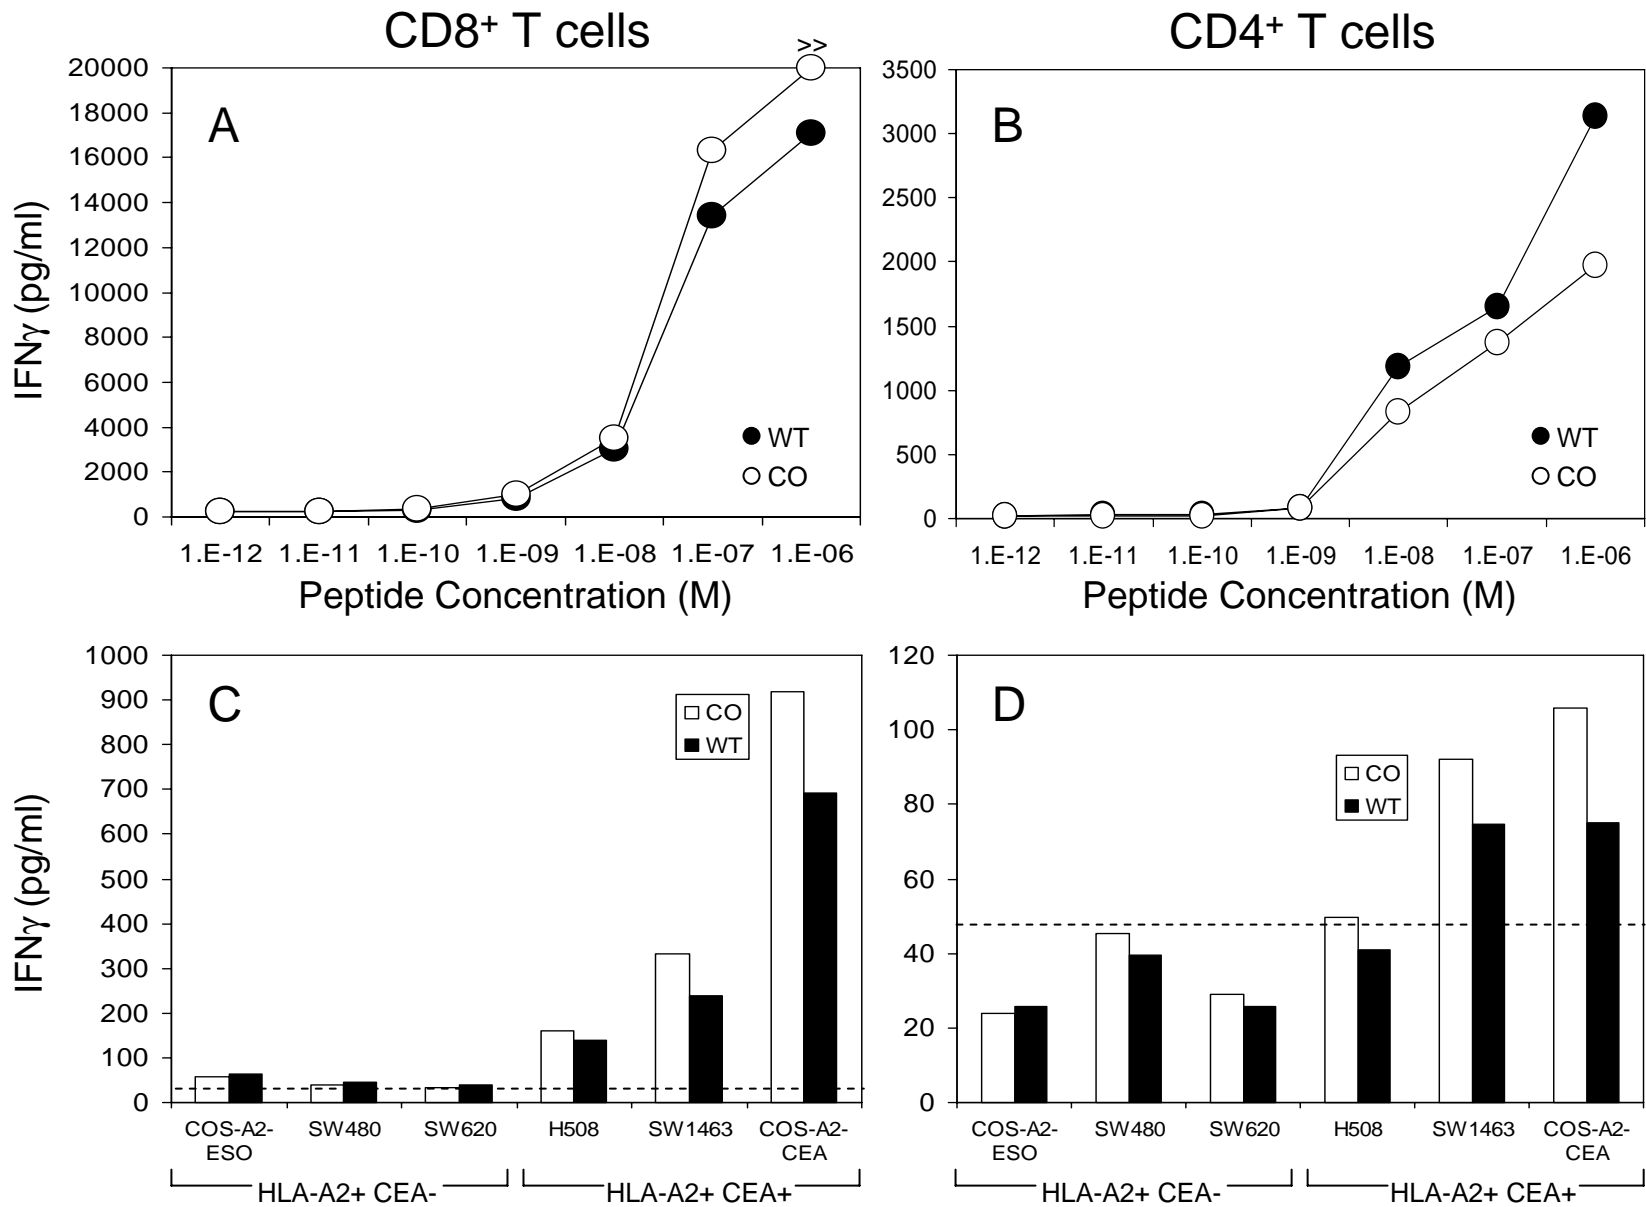

**Supplemental Figure 3:** Recognition of peptide and target cells expressing HLA-A2.1 and CEA by CD8<sup>+</sup> and CD4<sup>+</sup> T cells transfected with RNAs encoding CEA:691-699 reactive TCR  $\alpha$  chains and  $\beta$  chains. RNAs encoding wild type (WT) and codon optimized (CO) TCR  $\alpha$  and  $\beta$  chains were used to electroporate human CD8<sup>+</sup> (A and C) and CD4<sup>+</sup> (B and D) T cells previously stimulated to proliferate with anti-CD3 and IL-2. Two to four hours later, T cells were cocultured with various target cells. Approximately 20 hours later, IFN $\gamma$  secretion was measured in response to CEA:691-699 peptide-pulsed T2 cells (A and B) and HLA-A2.1+ CEA+ tumor cells or genetically engineered COS cells (C and D).

CDR3 mutations in TRAV8-1  $\alpha$  chain:

| Wt    | C | A | T | D | L        | T        | S        | G        | G        | N | Y | K |
|-------|---|---|---|---|----------|----------|----------|----------|----------|---|---|---|
| L110A |   |   |   |   | <u>A</u> | T        | S        | G        | G        |   |   |   |
| T111A |   |   |   |   | L        | <u>A</u> | S        | G        | G        |   |   |   |
| S112A |   |   |   |   | L        | T        | <u>A</u> | G        | G        |   |   |   |
| G113A |   |   |   |   | L        | T        | S        | <u>A</u> | G        |   |   |   |
| G114A |   |   |   |   | L        | T        | S        | G        | <u>A</u> |   |   |   |
| L110C |   |   |   |   | <u>C</u> | T        | S        | G        | G        |   |   |   |
| L110G |   |   |   |   | <u>G</u> | T        | S        | G        | G        |   |   |   |
| L110M |   |   |   |   | <u>M</u> | T        | S        | G        | G        |   |   |   |
| L110I |   |   |   |   | <u>I</u> | T        | S        | G        | G        |   |   |   |
| L110V |   |   |   |   | <u>V</u> | T        | S        | G        | G        |   |   |   |
| L110F |   |   |   |   | <u>F</u> | T        | S        | G        | G        |   |   |   |
| T111C |   |   |   |   | L        | <u>C</u> | S        | G        | G        |   |   |   |
| T111S |   |   |   |   | L        | <u>S</u> | S        | G        | G        |   |   |   |
| T111P |   |   |   |   | L        | <u>P</u> | S        | G        | G        |   |   |   |
| T111D |   |   |   |   | L        | <u>D</u> | S        | G        | G        |   |   |   |
| T111H |   |   |   |   | L        | <u>H</u> | S        | G        | G        |   |   |   |
| T111K |   |   |   |   | L        | <u>K</u> | S        | G        | G        |   |   |   |
| S112T |   |   |   |   | L        | T        | <u>T</u> | G        | G        |   |   |   |
| S112N |   |   |   |   | L        | T        | <u>N</u> | G        | G        |   |   |   |
| S112K |   |   |   |   | L        | T        | <u>K</u> | G        | G        |   |   |   |

### CD8<sup>+</sup> T cells

### CD4<sup>+</sup> T cells

wt

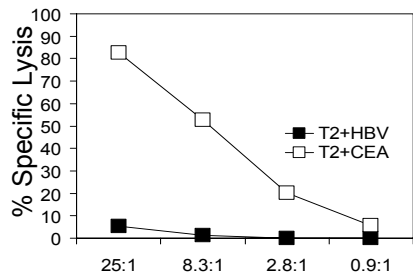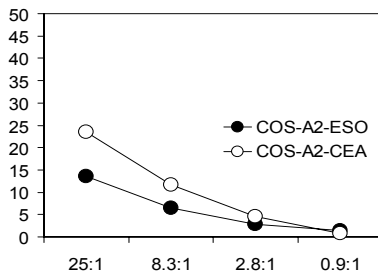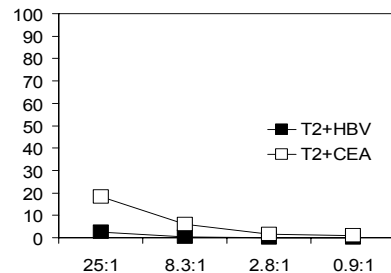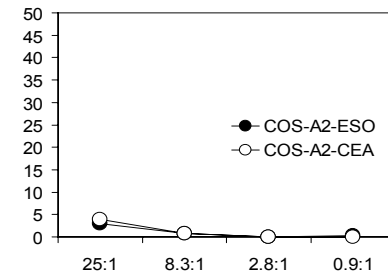

L110F

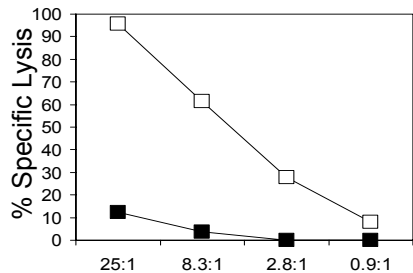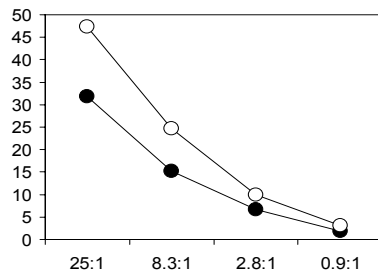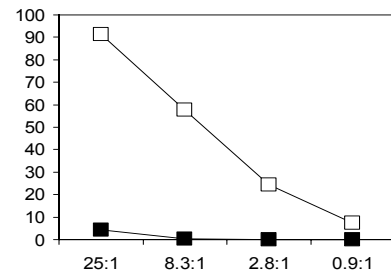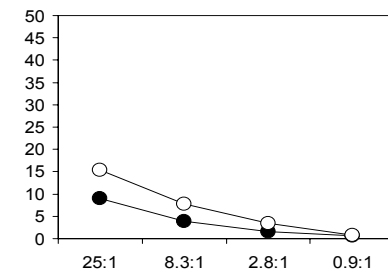

S112T

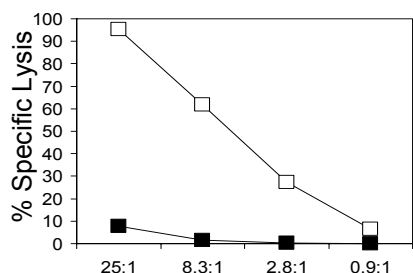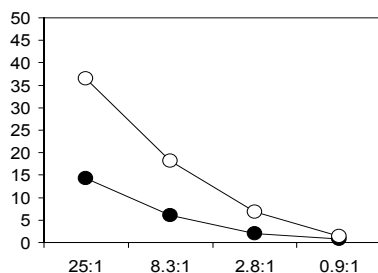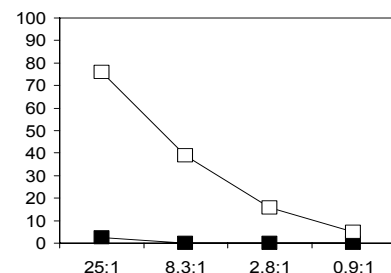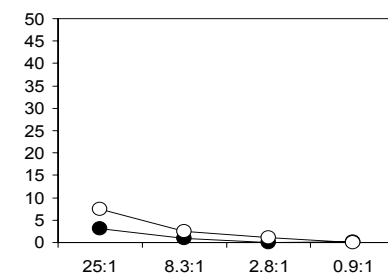

L110F  
S112T

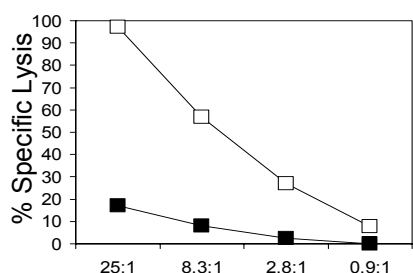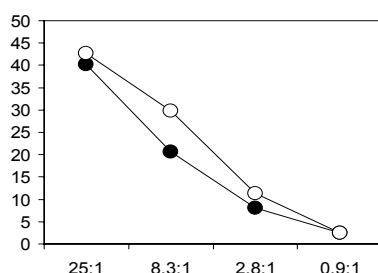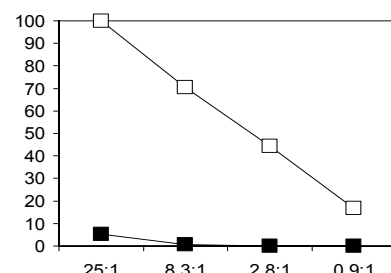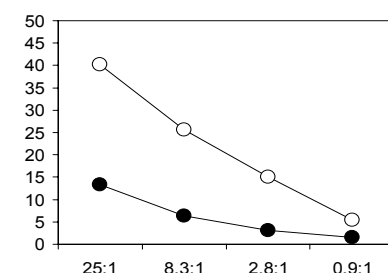

E:T Ratio

E:T Ratio

E:T Ratio

E:T Ratio

Supplemental Figure 5: Recognition of peptide and target cells expressing HLA-A2.1 and CEA by CD8+ and CD4+T cells transfected with RNAs encoding CEA:691-699 reactive TCR modified  $\alpha$  chains and wild type (wt)  $\beta$  chains. RNAs encoding TCR amino-acid substituted  $\alpha$  and wild type  $\beta$  chains were used to electroporate human CD8+ and CD4+ T cells previously stimulated to proliferate with anti-CD3 and IL-2. Approximately 24 hours later, T cell function was evaluated in a 4 hour  $^{51}\text{Cr}$  release lysis assay in response to CEA:691-699 peptide-pulsed T2 cells and COS-7 cells genetically engineered to express HLA-A2.1 and full-length CEA.

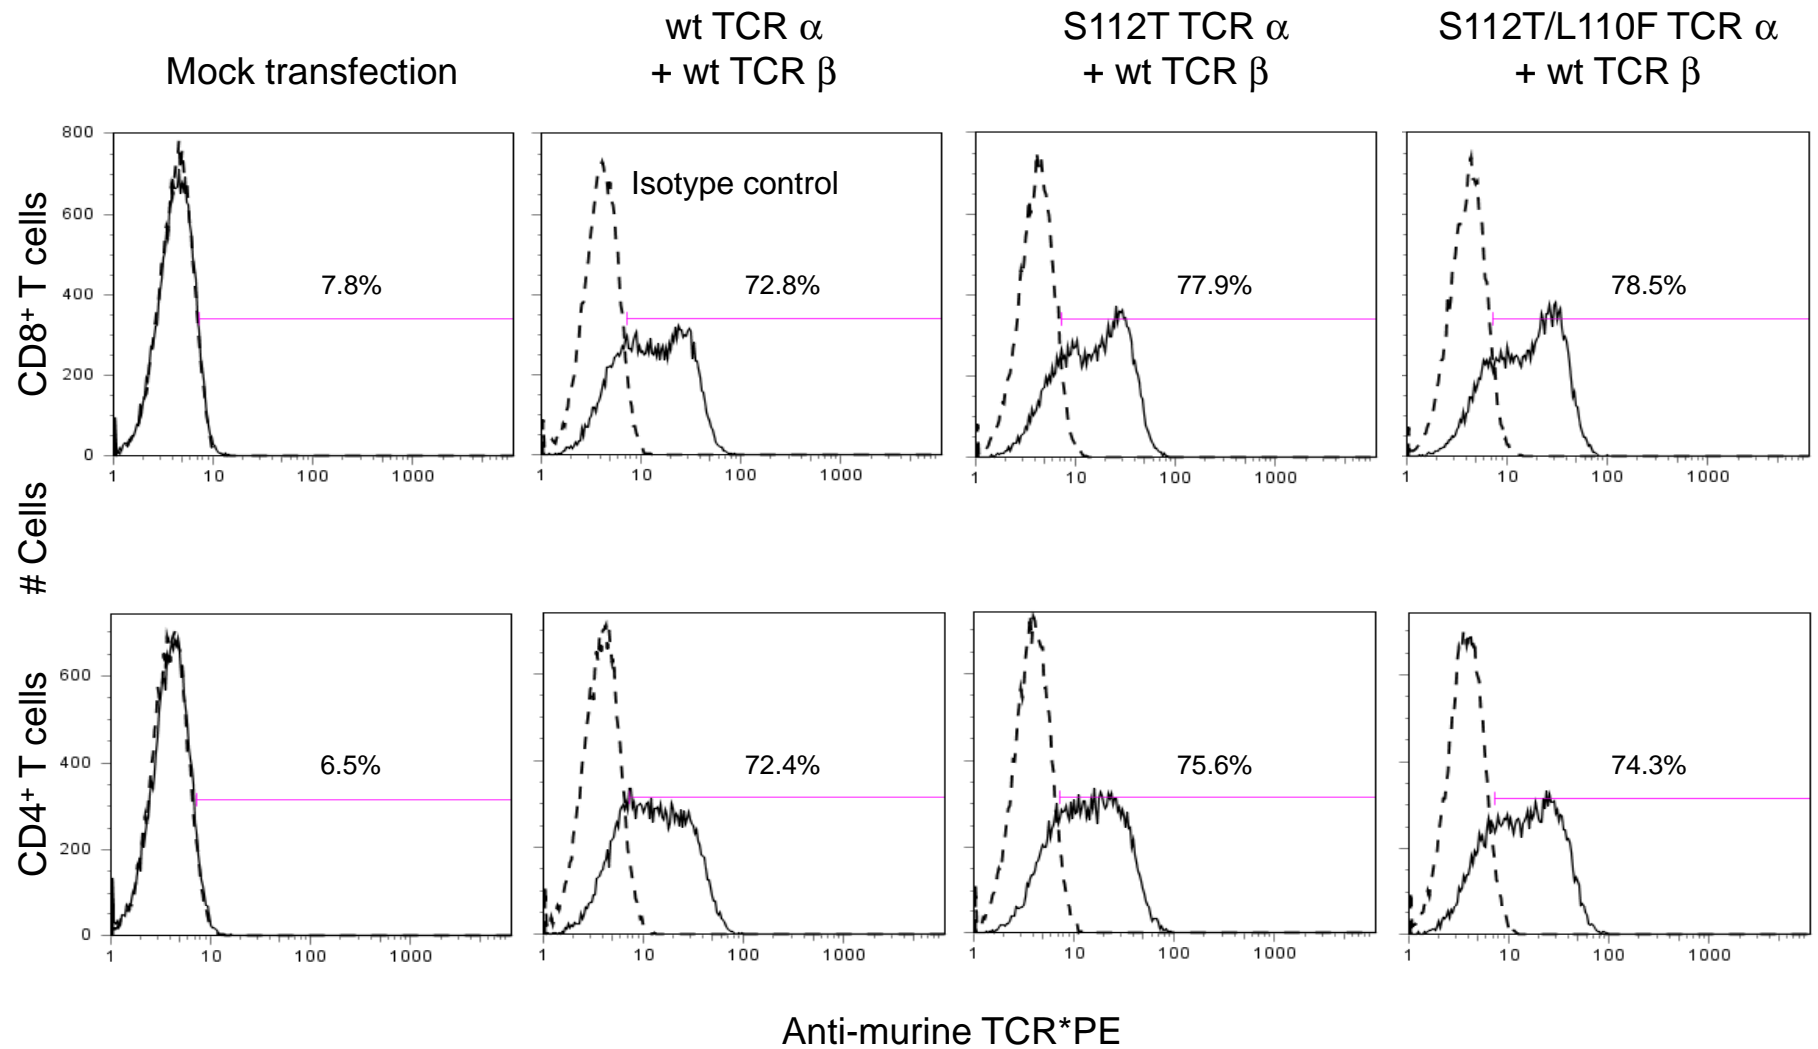

Supplemental Figure 6: Expression of murine TCR by T cells electroporated with CEA:691-699 reactive murine TCR  $\alpha$  and  $\beta$  chain RNAs. RNAs encoding wild type TCR  $\alpha$  and  $\beta$  chains and amino acid substituted TCR  $\alpha$  chains with wild type  $\beta$  chains were used to electroporate human CD8<sup>+</sup> and CD4<sup>+</sup> T cells previously stimulated to proliferate with anti-CD3 and IL-2. TCR expression was evaluated approximately 24 hours later by FACS using a monoclonal antibody against the constant region of the murine  $\beta$  chain.

Supplemental Table 1: Cross-recognition of homologous peptides from other CEA protein family members by CD8+ T cells transfected with RNAs encoding modified TCR  $\alpha$  chains and wt  $\beta$  chains derived from CEA:691-699 reactive murine T cell clones\*

|                        | CEACAM5<br>691-699<br>(IMIGVLVGV) | CEACAM3/21:<br>240-248<br>(ILIGVLVGS) | CEACAM4:36/3:<br>156-164<br>(IVTGVLVGV) | CEACAM8:<br>338-347<br>(IMIGVLARV) | CEACAM7/2a:<br>254-262<br>(IMIGVLAGM) | HBVc:<br>18-27(23Y)<br>(FLPSDYFPSV) |
|------------------------|-----------------------------------|---------------------------------------|-----------------------------------------|------------------------------------|---------------------------------------|-------------------------------------|
| <u>wt</u>              |                                   |                                       |                                         |                                    |                                       |                                     |
| T2+10 <sup>-12</sup> M | 96                                | 54                                    | 59                                      | 47                                 | 52                                    | -                                   |
| T2+10 <sup>-11</sup> M | 80                                | 46                                    | 62                                      | 60                                 | 49                                    | -                                   |
| T2+10 <sup>-10</sup> M | <u>842</u> <sup>†</sup>           | 44                                    | 32                                      | 48                                 | 46                                    | -                                   |
| T2+10 <sup>-9</sup> M  | <u>&gt;1000</u>                   | 40                                    | 48                                      | 53                                 | 58                                    | -                                   |
| T2+10 <sup>-8</sup> M  | <u>&gt;1000</u>                   | 60                                    | 56                                      | 48                                 | 53                                    | -                                   |
| T2+10 <sup>-7</sup> M  | <u>&gt;1000</u>                   | <u>322</u>                            | 87                                      | 45                                 | 77                                    | -                                   |
| T2+10 <sup>-6</sup> M  | <u>&gt;1000</u>                   | <u>895</u>                            | <u>160</u>                              | 60                                 | 57                                    | 44                                  |
| <u>S112T</u>           |                                   |                                       |                                         |                                    |                                       |                                     |
| T2+10 <sup>-12</sup> M | 128                               | 66                                    | 52                                      | 44                                 | 62                                    | -                                   |
| T2+10 <sup>-11</sup> M | <u>505</u>                        | 45                                    | 44                                      | 40                                 | 78                                    | -                                   |
| T2+10 <sup>-10</sup> M | <u>&gt;1000</u>                   | 77                                    | 76                                      | 70                                 | 71                                    | -                                   |
| T2+10 <sup>-9</sup> M  | <u>&gt;1000</u>                   | <u>353</u>                            | <u>&gt;1000</u>                         | 55                                 | 67                                    | -                                   |
| T2+10 <sup>-8</sup> M  | <u>&gt;1000</u>                   | <u>&gt;1000</u>                       | <u>&gt;1000</u>                         | <u>312</u>                         | 75                                    | -                                   |
| T2+10 <sup>-7</sup> M  | <u>&gt;1000</u>                   | <u>&gt;1000</u>                       | <u>&gt;1000</u>                         | <u>&gt;1000</u>                    | 67                                    | -                                   |
| T2+10 <sup>-6</sup> M  | <u>&gt;1000</u>                   | <u>&gt;1000</u>                       | <u>&gt;1000</u>                         | <u>&gt;1000</u>                    | 54                                    | 81                                  |
| <u>L110F S112T</u>     |                                   |                                       |                                         |                                    |                                       |                                     |
| T2+10 <sup>-12</sup> M | 283                               | 170                                   | 128                                     | 286                                | 186                                   | -                                   |
| T2+10 <sup>-11</sup> M | <u>&gt;1000</u>                   | 317                                   | 146                                     | 218                                | 213                                   | -                                   |
| T2+10 <sup>-10</sup> M | <u>&gt;1000</u>                   | <u>&gt;1000</u>                       | 188                                     | 172                                | 252                                   | -                                   |
| T2+10 <sup>-9</sup> M  | <u>&gt;1000</u>                   | <u>&gt;1000</u>                       | 351                                     | 167                                | 303                                   | -                                   |
| T2+10 <sup>-8</sup> M  | <u>&gt;1000</u>                   | <u>&gt;1000</u>                       | <u>&gt;1000</u>                         | 393                                | <u>720</u>                            | -                                   |
| T2+10 <sup>-7</sup> M  | <u>&gt;1000</u>                   | <u>&gt;1000</u>                       | <u>&gt;1000</u>                         | <u>&gt;1000</u>                    | <u>&gt;1000</u>                       | -                                   |
| T2+10 <sup>-6</sup> M  | <u>&gt;1000</u>                   | <u>&gt;1000</u>                       | <u>&gt;1000</u>                         | <u>&gt;1000</u>                    | <u>&gt;1000</u>                       | 199                                 |

\* IFN $\gamma$  secretion (pg/ml) in 20 hr coculture supernatants of target cells with electroporated human CD8+ T cells

<sup>†</sup> Underlined values for peptide-pulsed targets indicate that IFN $\gamma$  release in response to T2 cells pulsed with the indicated concentration of CEA:691-699 was  $\geq 50$  pg/ml and at least twice background with media and T2 cells preloaded with 1  $\mu$ g/ml of the negative control peptide HBVc:18-27(23Y).
